# Supplementary material
Source: Springer Nature journal article supplement (https://www.springermedizin.de/resource/supplementary/12899_2010_168_MOESM13_ESM.pdf/9514586)

**A**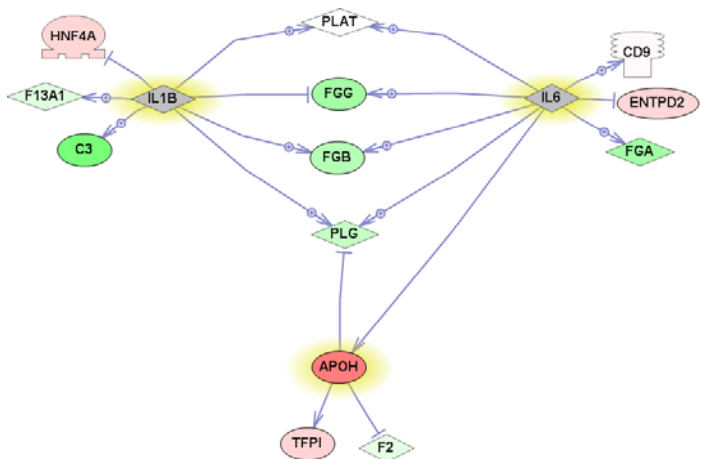
 $\text{Log}_2 (\text{CR2W}/\text{OF1W})$ 
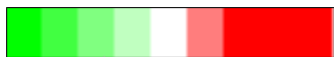

-2    -1    0    1    2

**B**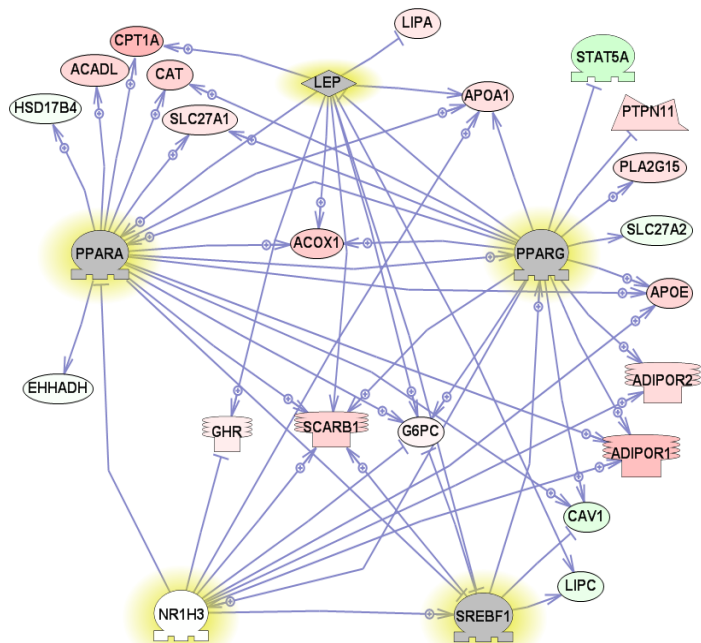

Supplement: MOESM13 [file 9514586]
